# Supplementary material for: Safety and immunogenicity of rVSVΔG-ZEBOV-GP Ebola vaccine in adults and children in Lambaréné, Gabon: A phase I randomised trial
Source: PLoS Med. 2017 Oct 6;14(10):e1002402. doi: 10.1371/journal.pmed.1002402 (PMC5630143; doi:10.1371/journal.pmed.1002402)
Supplement: S4 Fig — (DOCX) [file pmed.1002402.s004.docx]

# **S4 Fig. ZEBOV antibodies measured by whole-virion ELISA by age group in individuals without baseline antibodies**


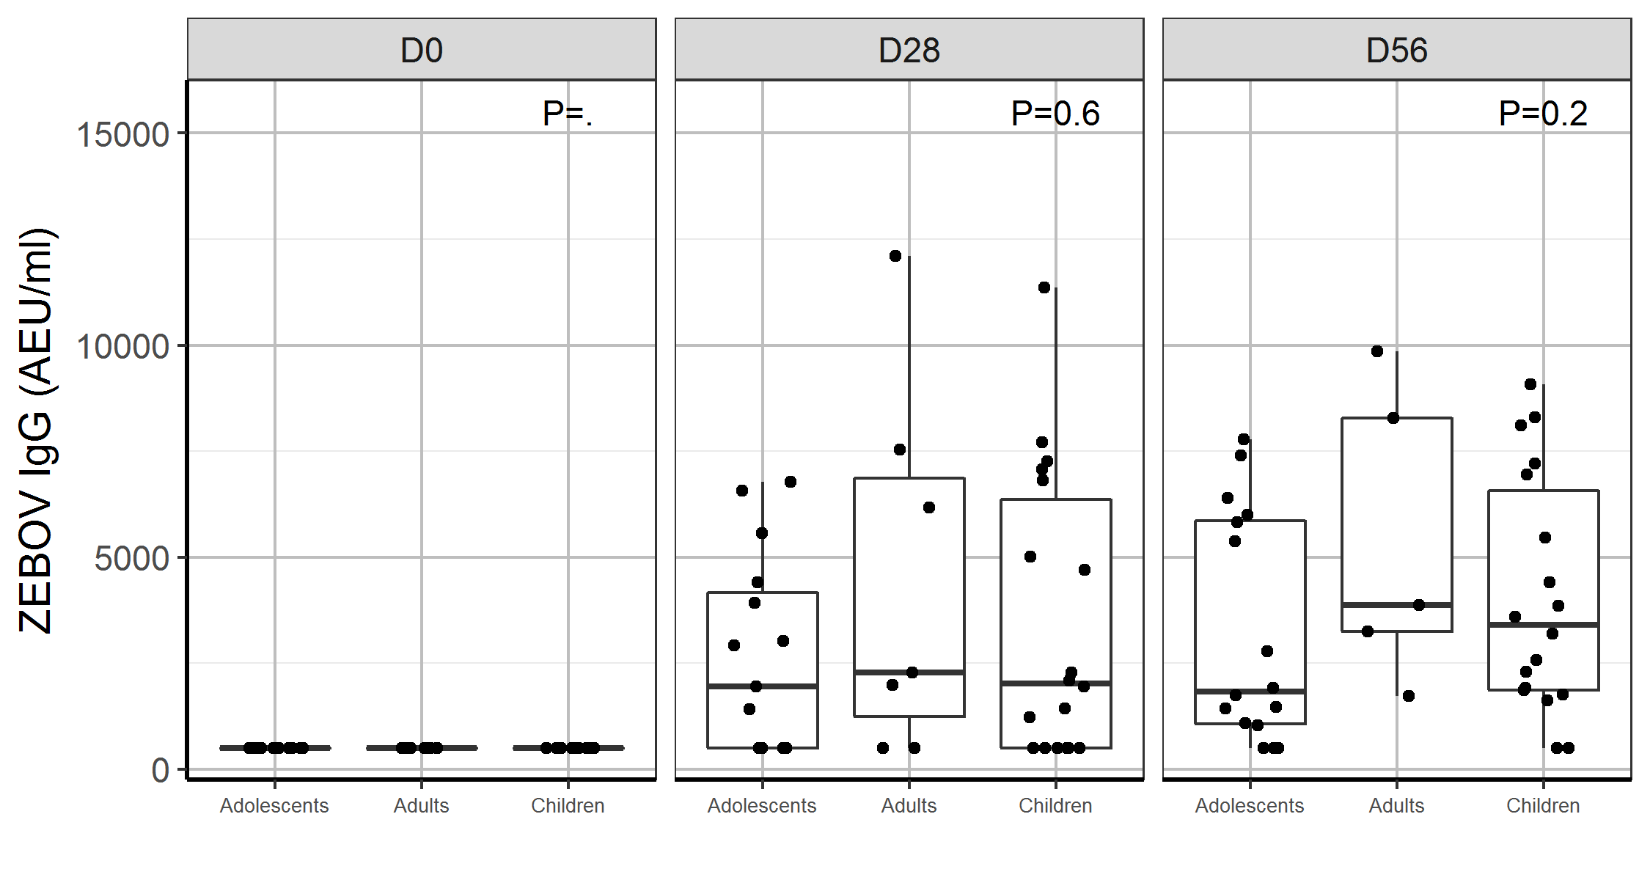


**S4 Fig. ZEBOV antibody distribution measured by whole-virion ELISA (AEU/ml) and presented per age group in individuals without baseline antibodies. Comparison of IgG antibodies in children, adolescents and adults without baseline antibodies vaccinated with 2x107 PFU dose at day 0, 28 and 56. P<0.05 indicates a statistical difference in antibody concentrations between age groups at the measured time point.**
